# Supplementary material for: The effects of Pseudomonas strains isolated from Achnatherum inebrians on plant growth: A genomic perspective
Source: PubMed Central journal article supplement (PMC11465459; doi:10.1111/1758-2229.70011), 2024-10-10
Supplement: EMI4-16-e70011-s002.pdf [file EMI4-16-e70011-s002.pdf]

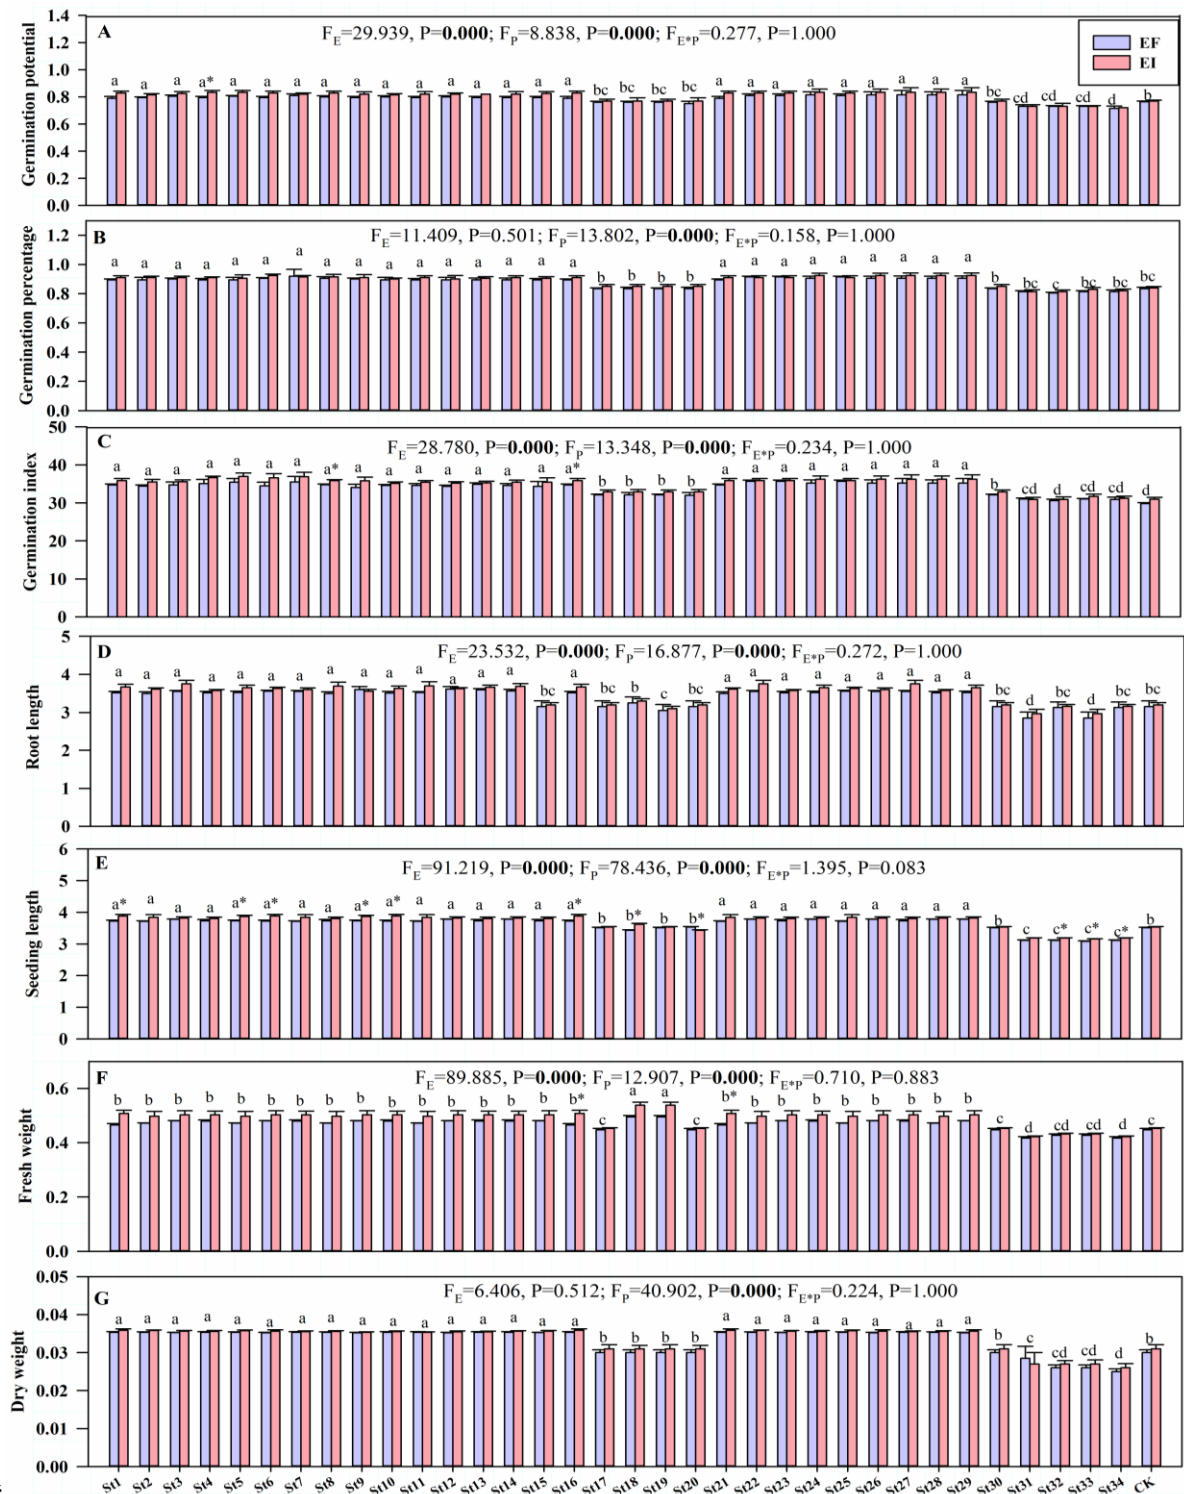

**Figure S1.** Effects of *Epichloë* endophyte and *Pseudomonas* on germination potential (A), germination percentage (B), germination index (C), root length (D), seeding length (E), fresh weight (F), dry weight (G) of *A. inebrians* seeds. (EI: endophyte-infected, EF: endophyte-free, E was the *Epichloë* endophyte fungi, P was inoculating of *Pseudomonas*. St1-St34 represented inoculating different *Pseudomonas* strains. CK represented inoculating LB fluid nutrient medium on *A. inebrians*. These small letters indicated mean significant difference at  $P<0.05$  among different inoculations. The \* represented there is a significant difference between EI and EF.)

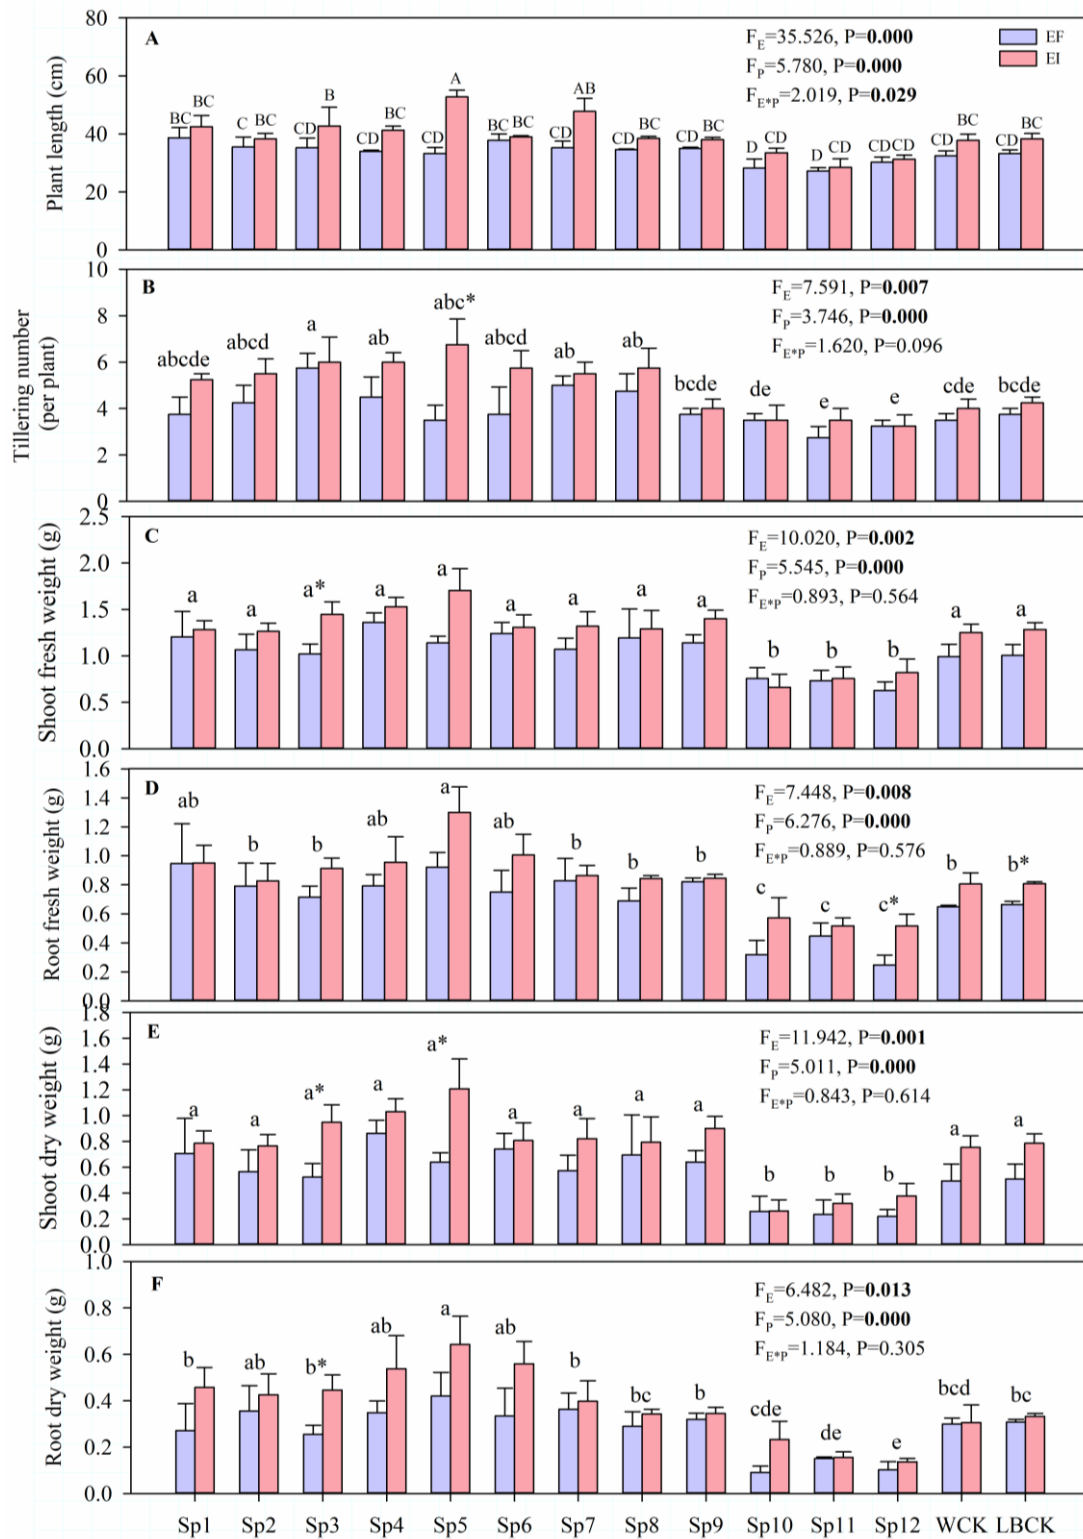

**Figure S2.** Effects of *Epichloë* endophyte and *Pseudomonas* on plant length (A), tillering number (B), shoot fresh weight (C), root fresh weight (D), shoot dry weight (E) and root dry weight (F) of *A. inebrians* plants. (E was the *Epichloë* endophyte, P was inoculating of *Pseudomonas*. These small letters indicated mean significant difference at  $P < 0.05$  among different inoculations of *A. inebrians* plants. The \* represented there is a significant difference between EI and EF. Different capital letters indicate significant ( $P < 0.05$ ) difference between all treatments.)

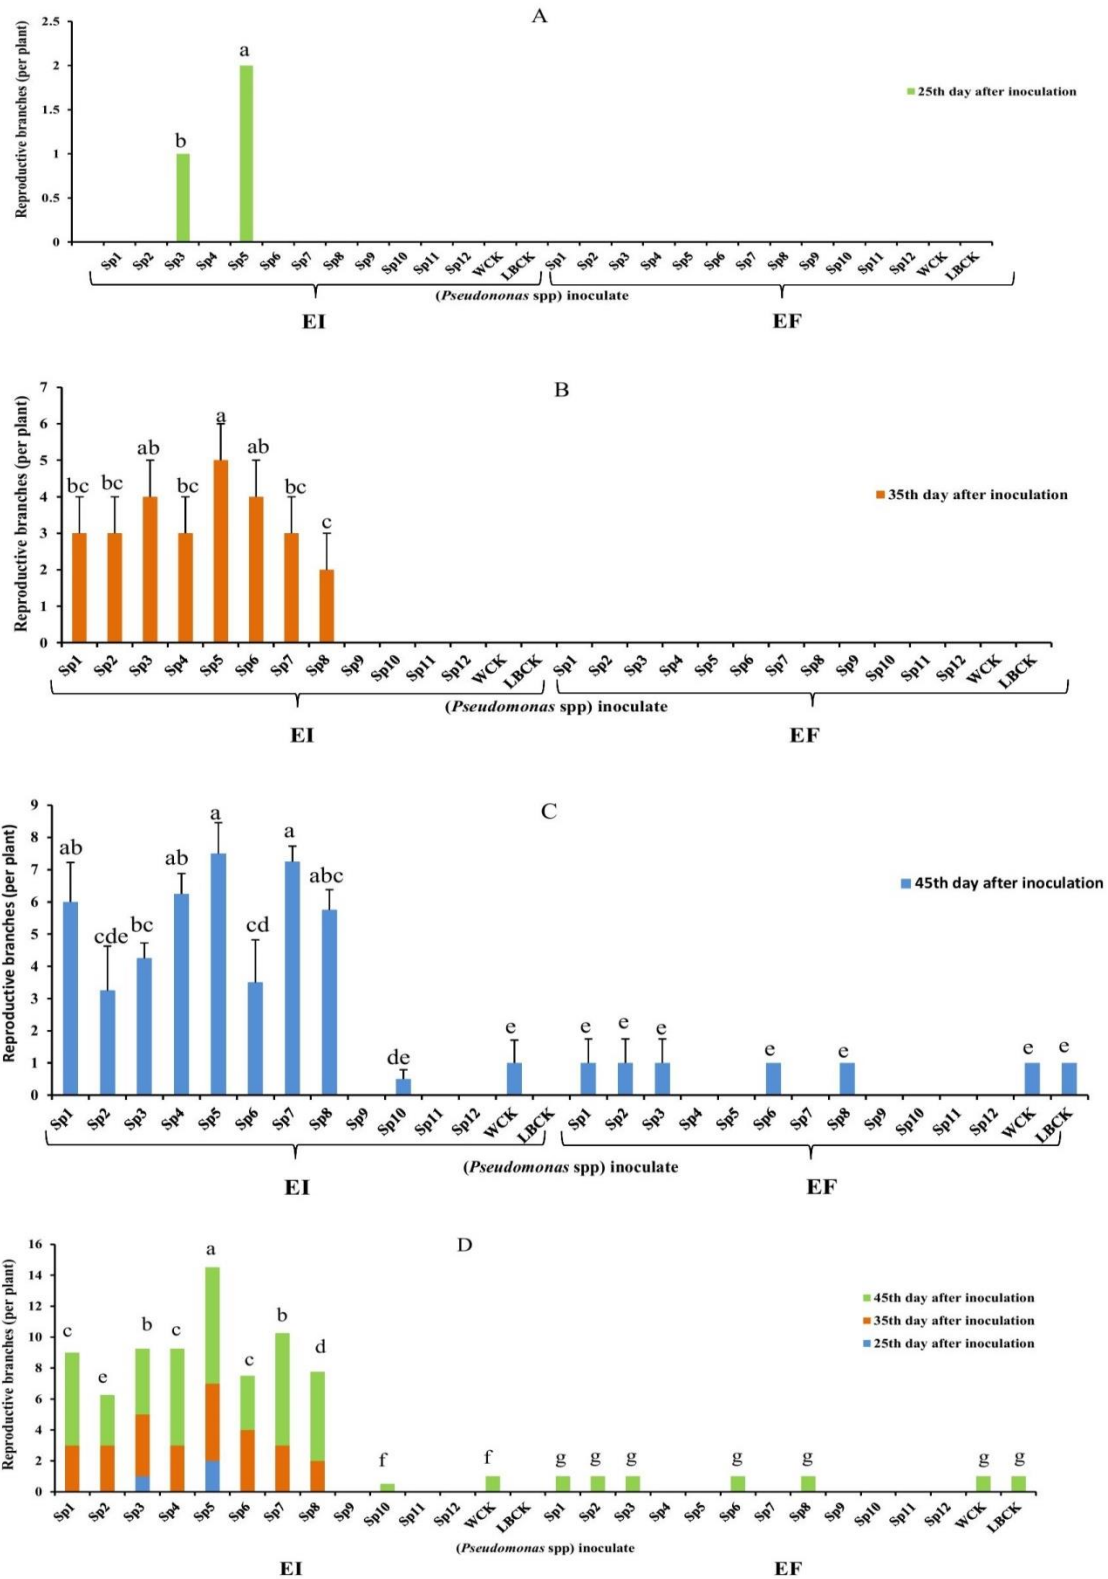

**Figure S3.** The number of reproductive branches in *A. inebrians* under inoculating *Pseudomonas*. (A) was the number of reproductive branches of *A. inebrians* under inoculating *Pseudomonas* at the 25th day; (B) was the number of reproductive branches of *A. inebrians* under inoculating *Pseudomonas* at the 35th day; (C) was the number of reproductive branches of *A. inebrians* under inoculating *Pseudomonas* at the 45th day; and (D) was the total reproductive branches of *A. inebrians* under inoculating *Pseudomonas*.

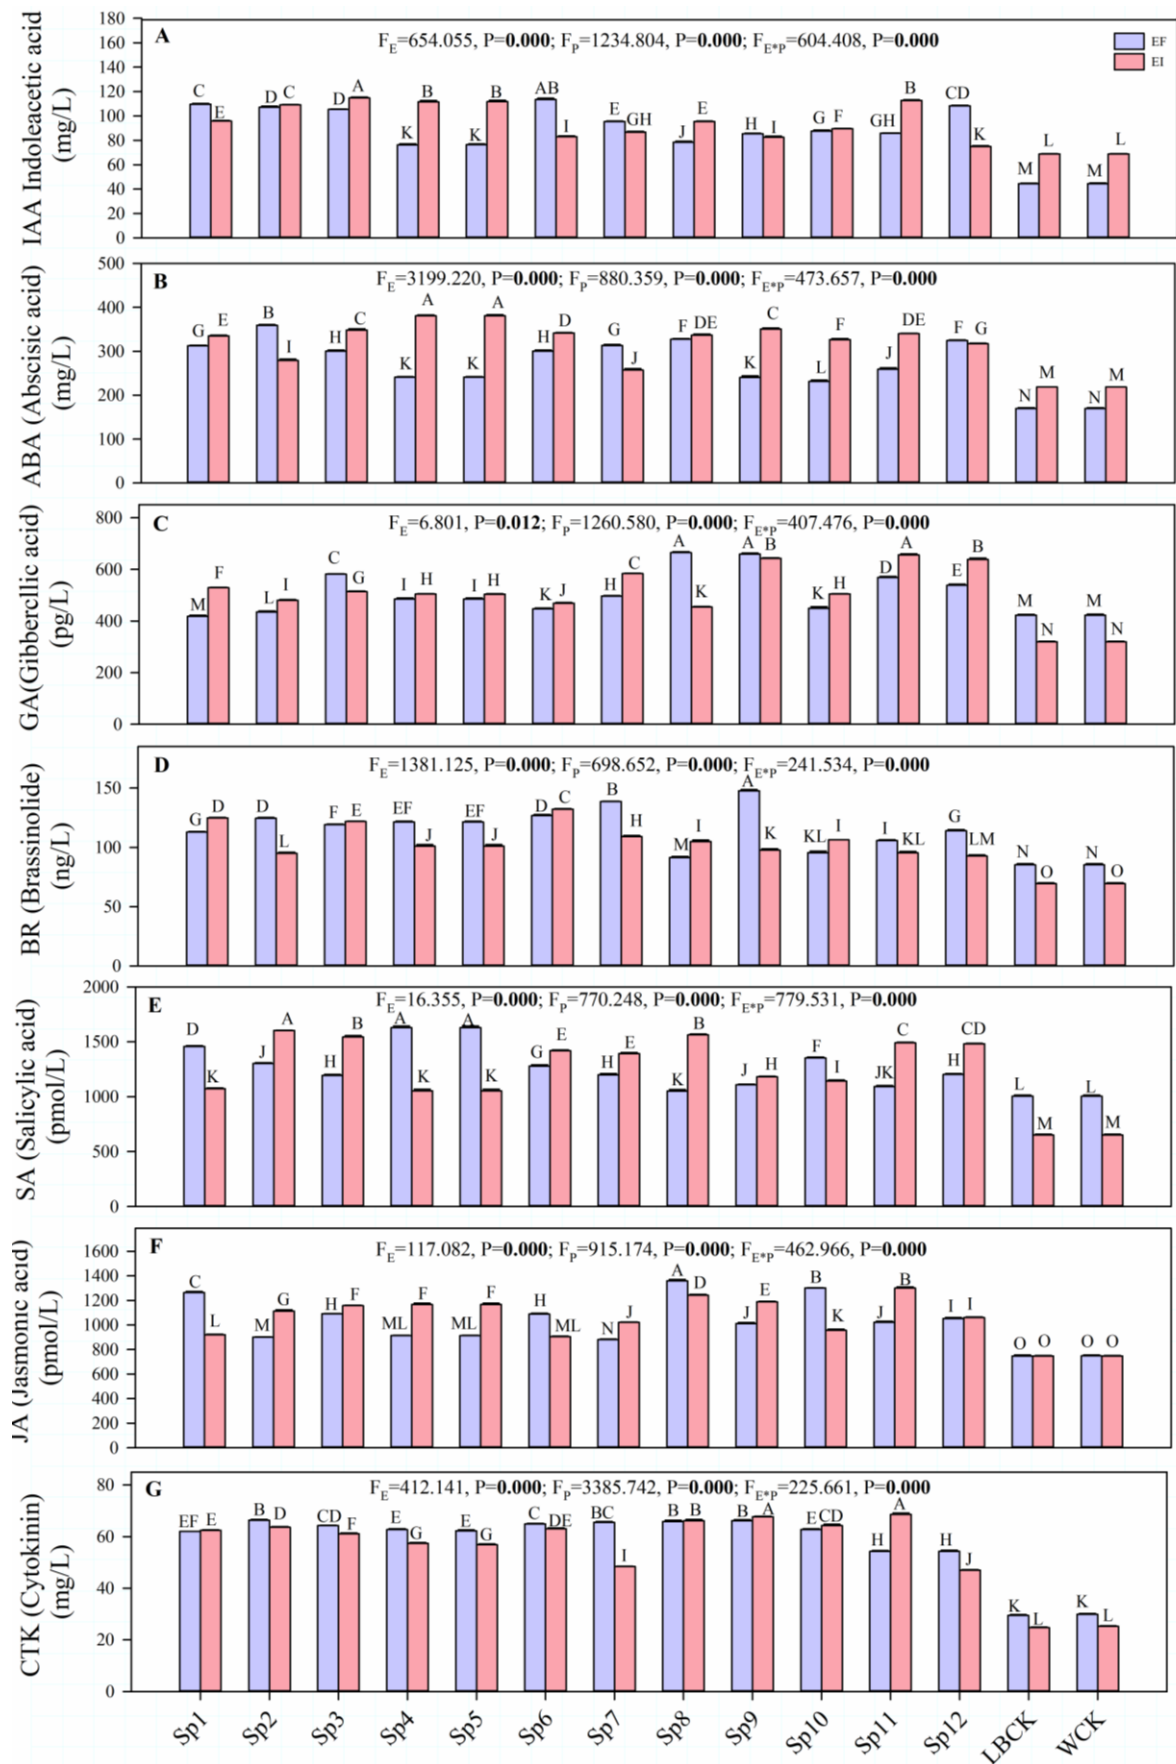

**Figure S4.** Effects of *Epichloë* endophyte (E) and inoculate *Pseudomonas* strains on IAA (A), ABA (B), GA (C), BR (D), SA (E), JA (F) and BR (G) of *A. inebrians* plants.

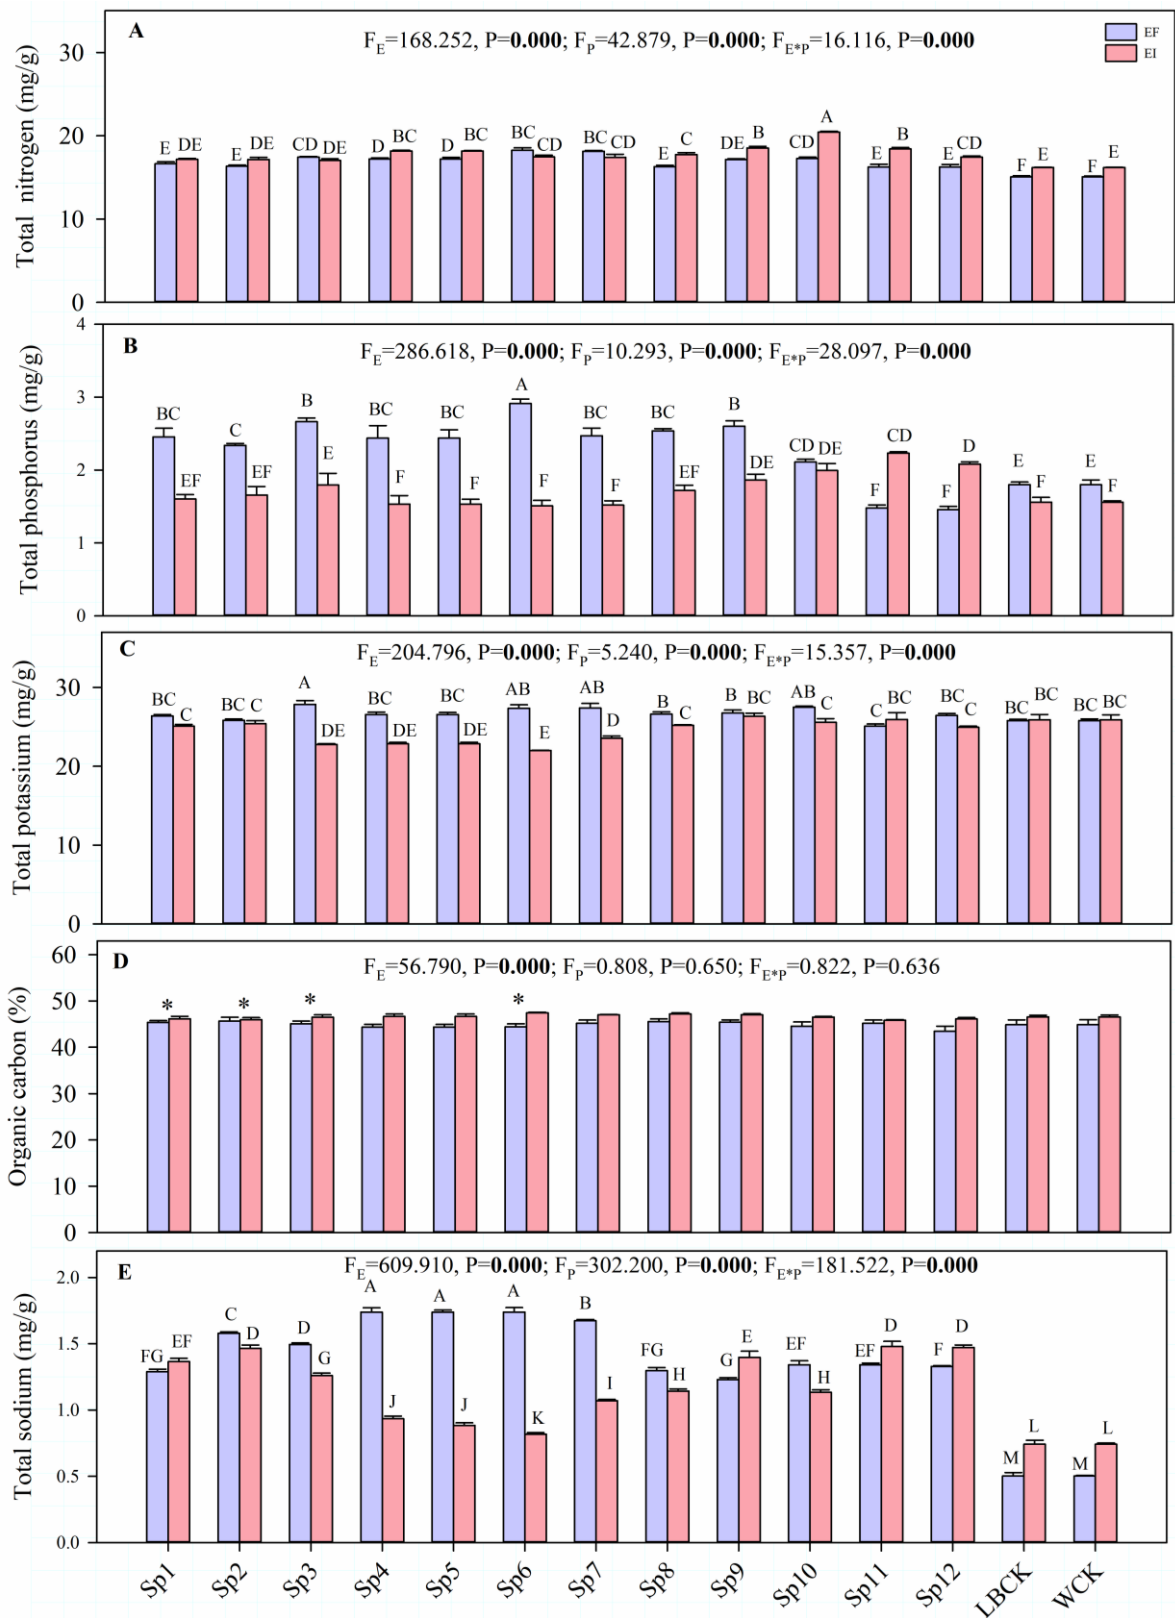

**Figure S5.** Effects of *Epichloë* endophyte (E) and inoculation of *Pseudomonas* strains on total nitrogen (A), total phosphorus (B), total potassium (C), organic carbon (D) and total sodium (E) of *A. inebrians* plants.



**A**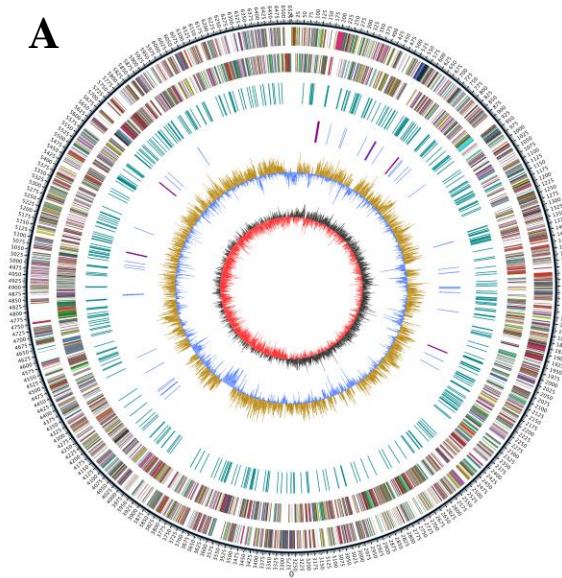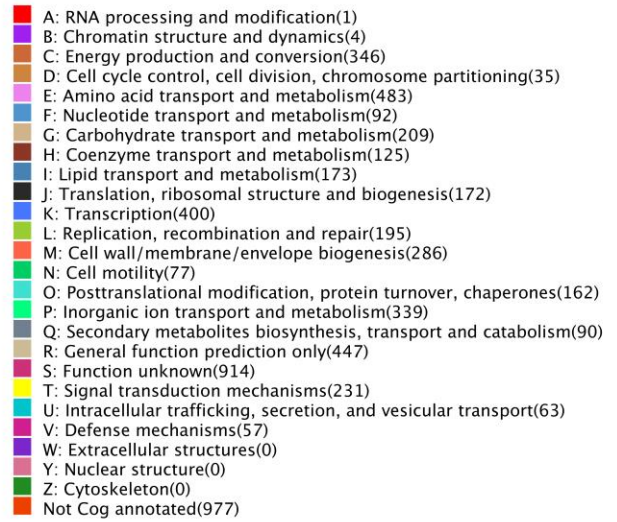**B**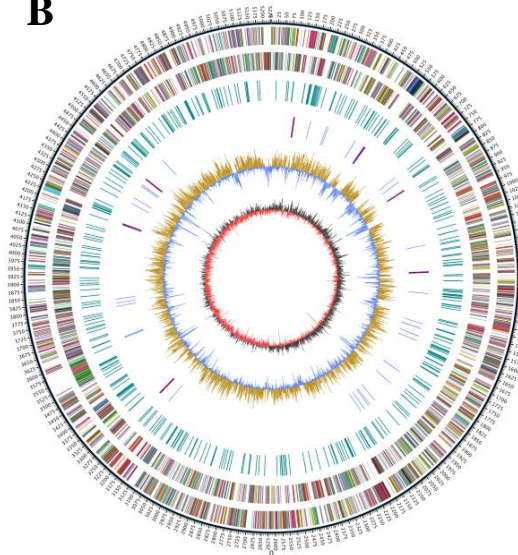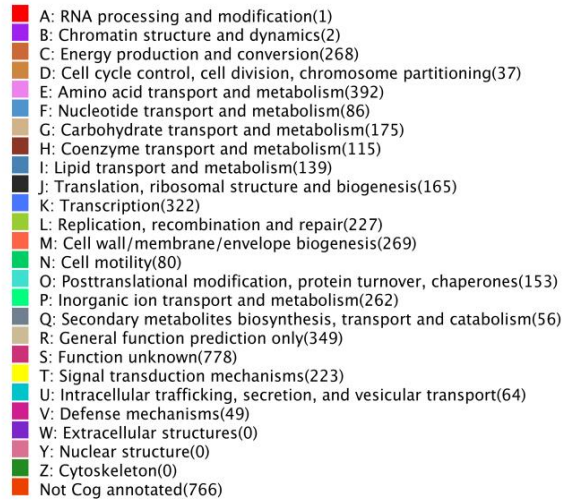**C**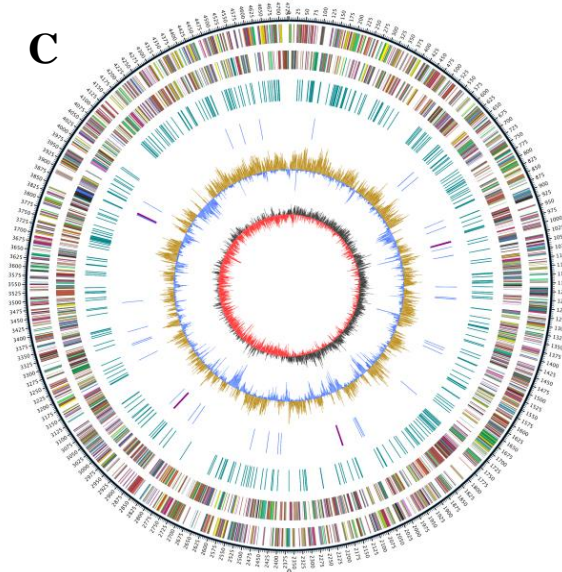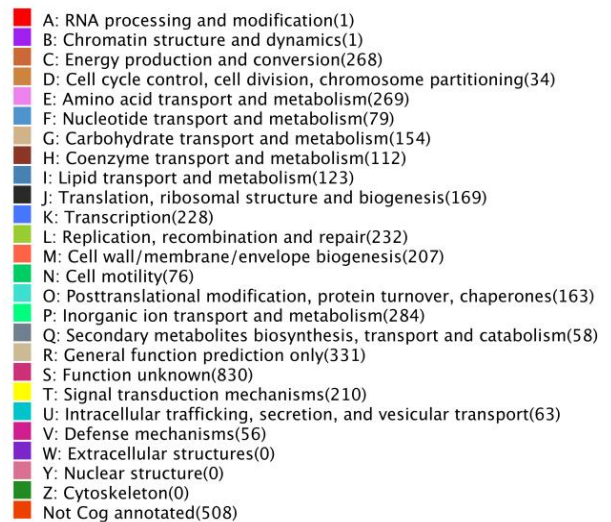



**D**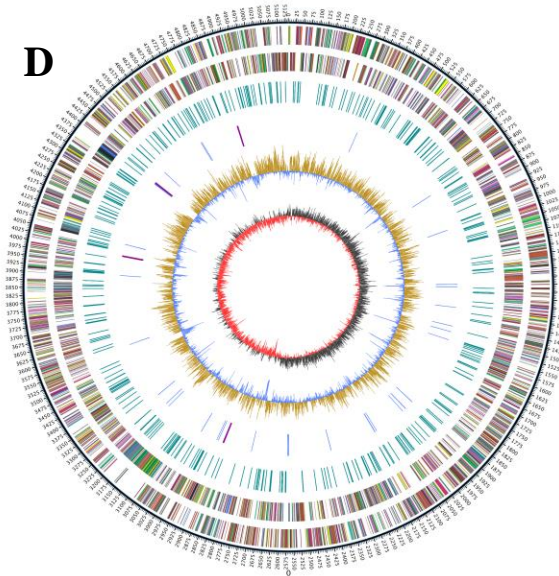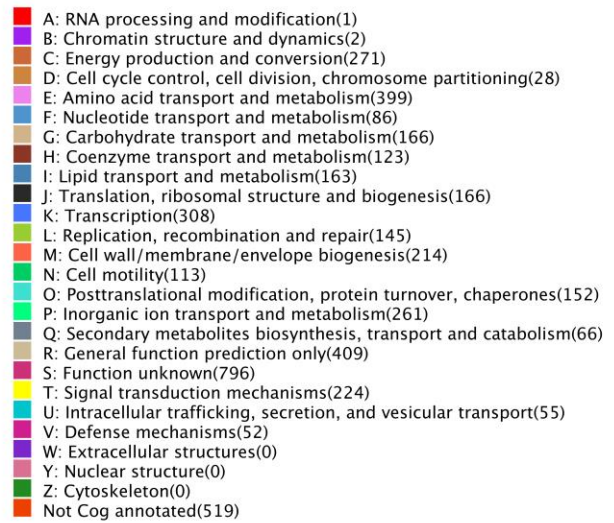**E**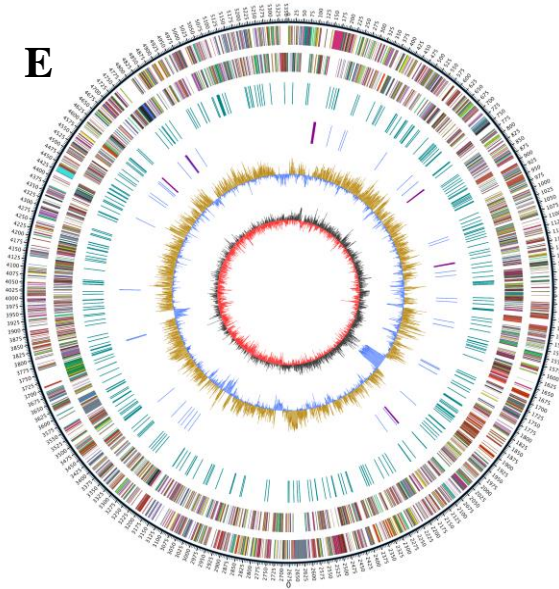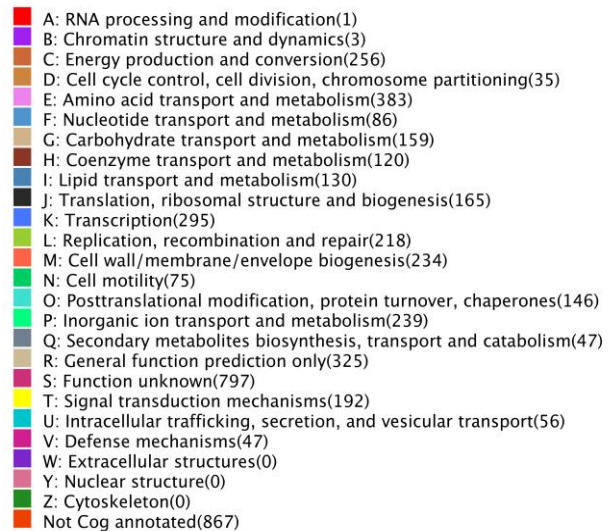**F**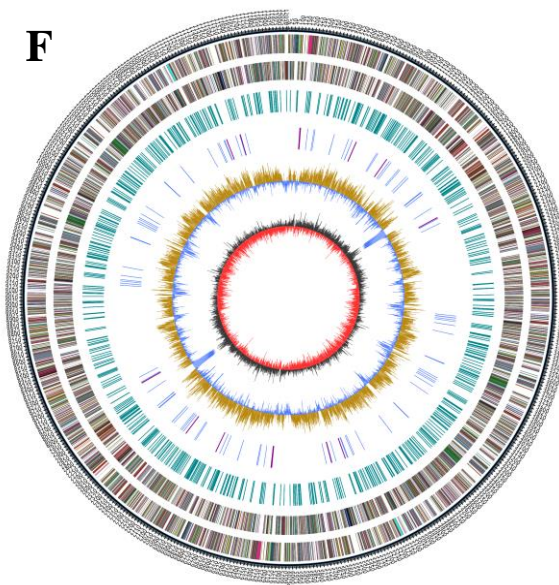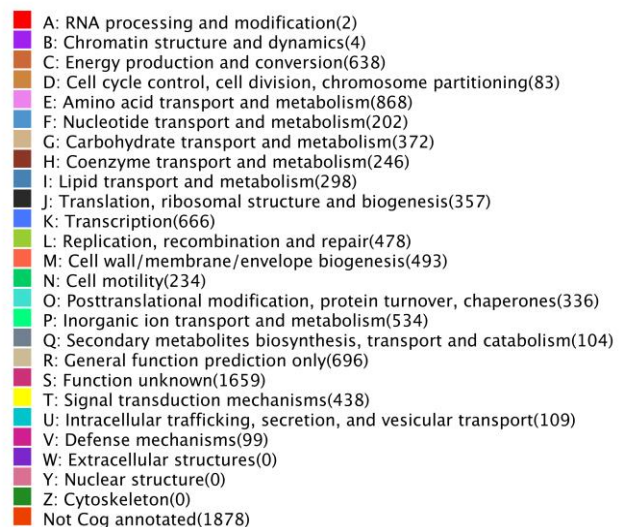

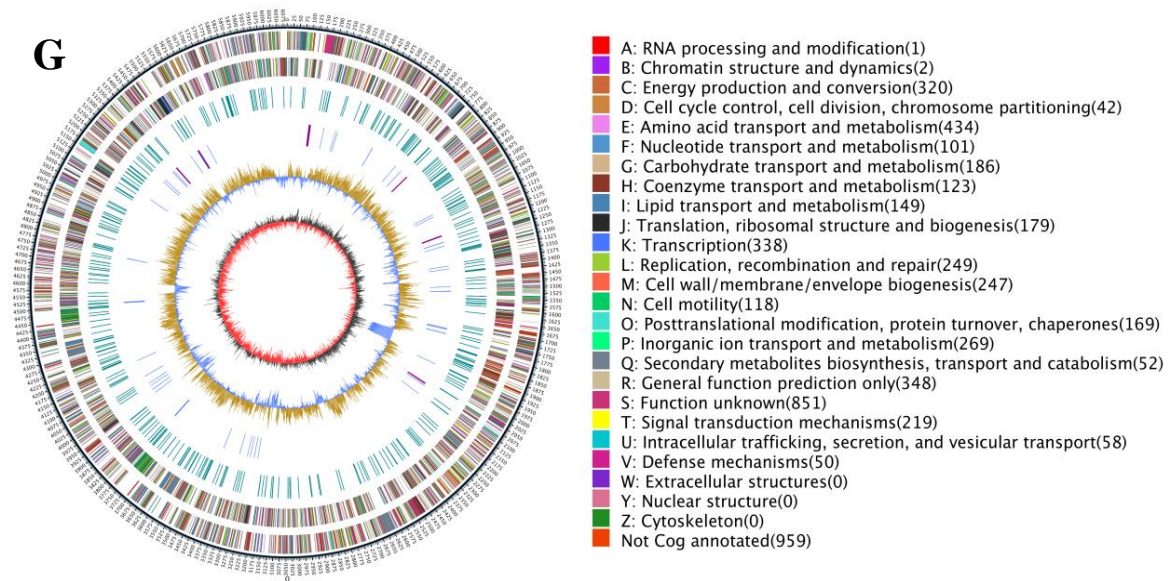

**Figure S6.** Genomic map of *Pseudomonas*. A: Sp1; B: Sp3; C: Sp5; D: Sp7; E: Sp10; F: Sp11; G: Sp12.

Note: The outermost circle represents the size of the genome, which is 5kb; The second and third circles represent genes on the positive and negative strands of the genome, respectively, with different colors representing different COG functions of genes. The fourth circle is a repeating sequence; the fifth circle has blue tRNA and purple rRNA; The sixth circle represents the GC content. Yellow indicates that the GC content in the region is higher than the average GC content of the genome, while blue indicates that the GC content in the region is lower than the average GC content of the genome. The higher the peak, the greater the difference between the GC content and the average GC content; The innermost circle is GC skew, with red indicating areas where C content is greater than G, and dark gray indicating areas where G content is greater than C.



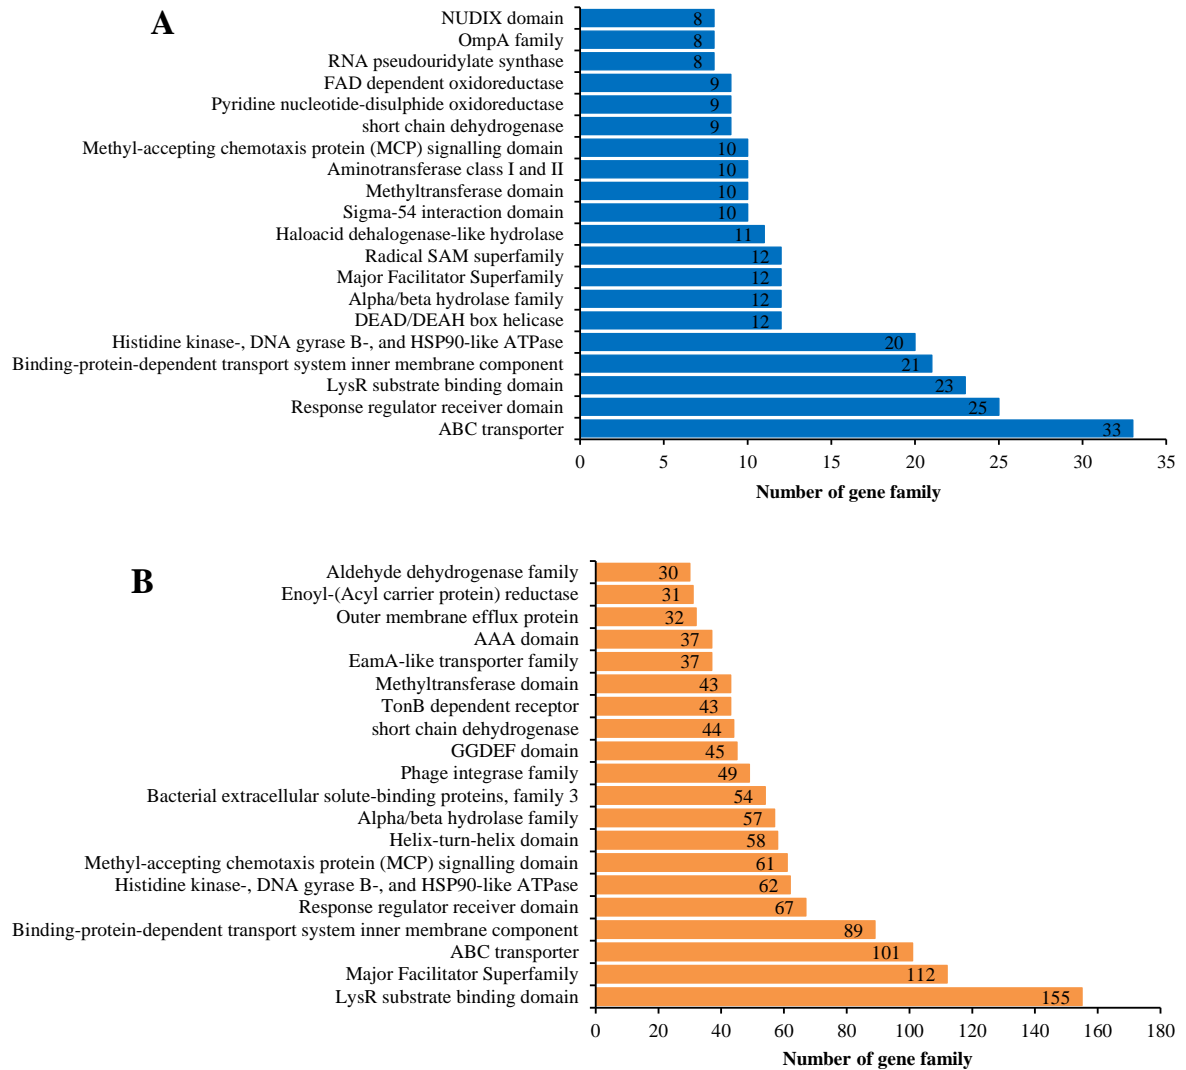

**Figure S7.** Annotated information of the top 20 core genome (A) and dispensable genome (B).

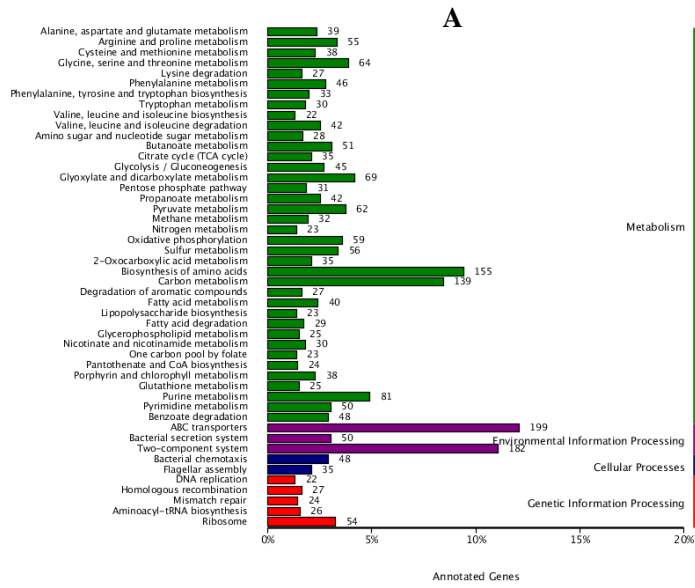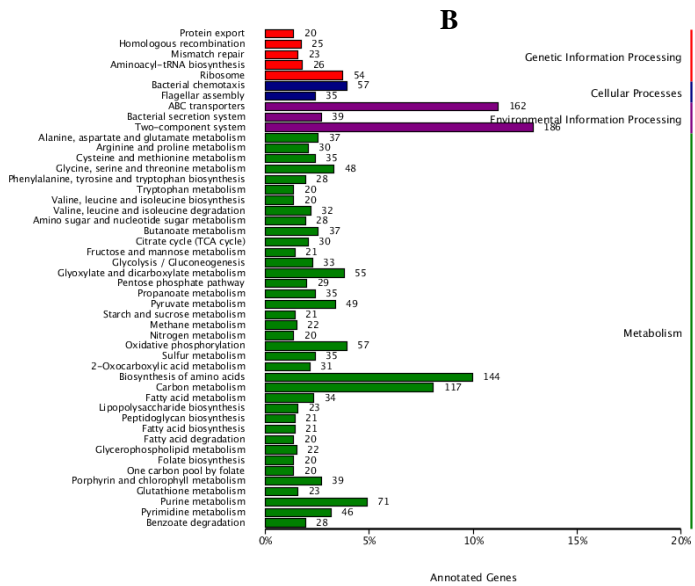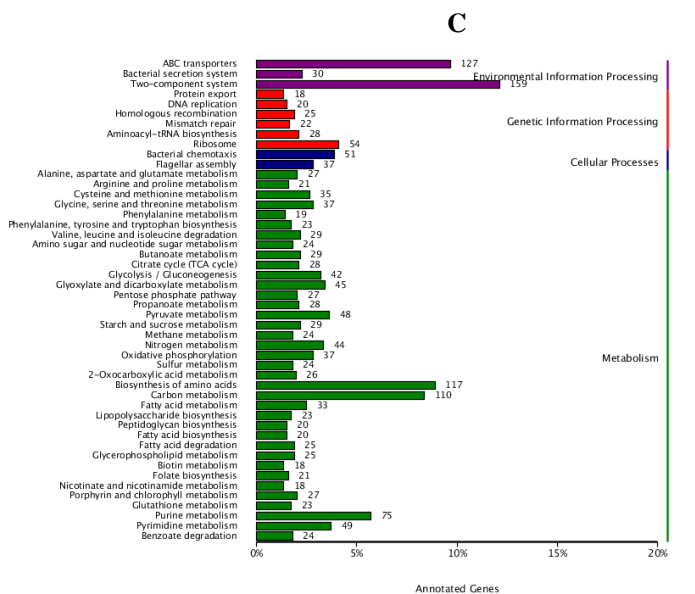

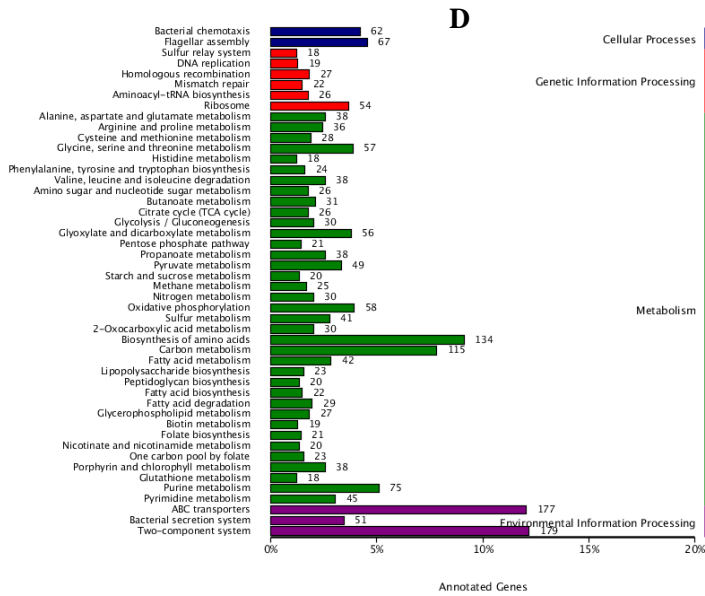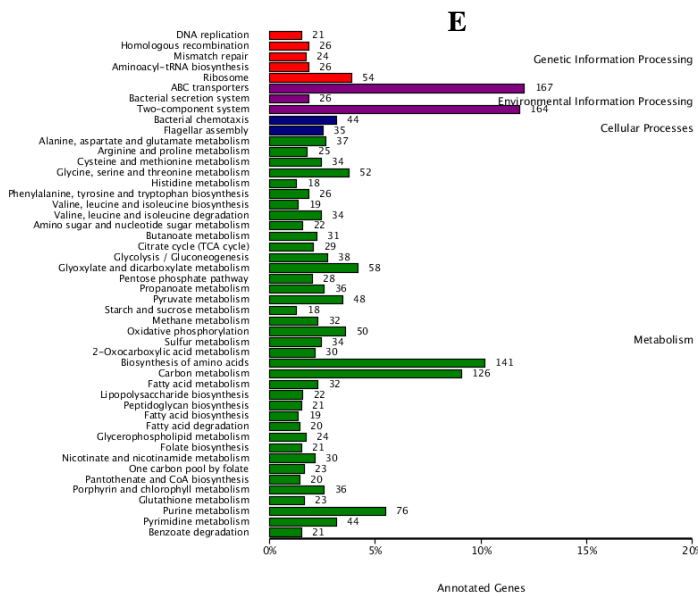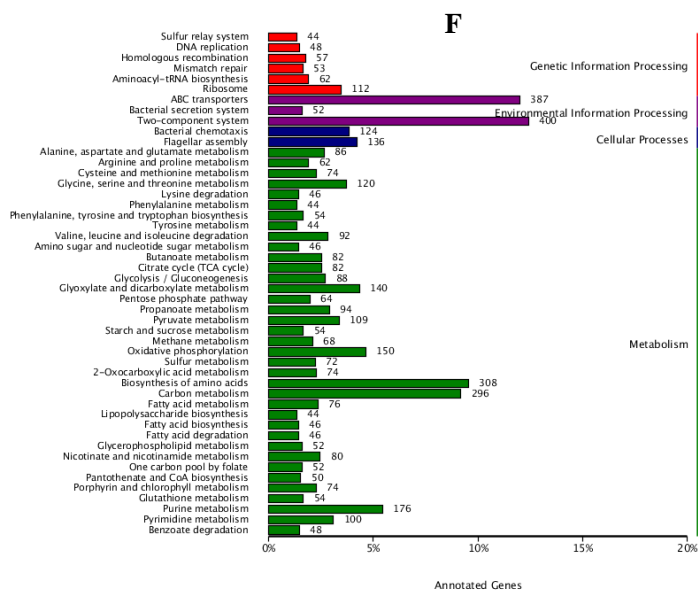



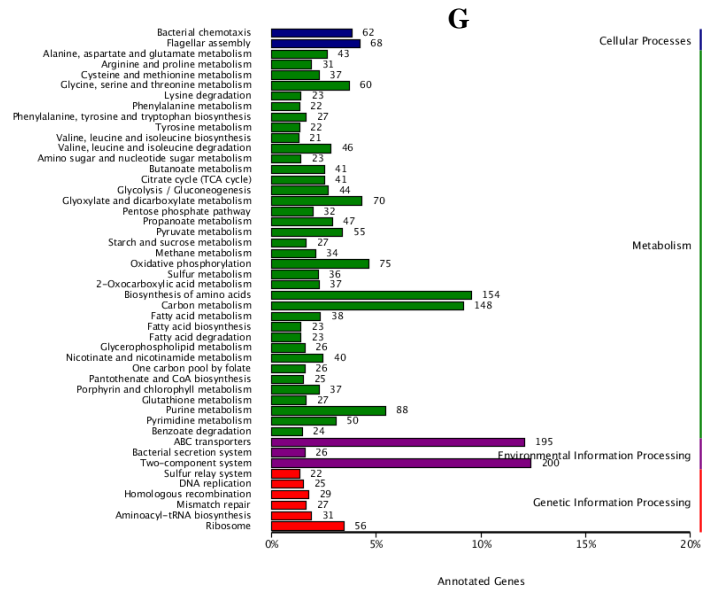

**Figure S8.** Specific gene family annotation information, A: Strain Sp1; B: Strain Sp3; C: Strain Sp5; D: Strain Sp7; E: Strain Sp10; F: Strain Sp11; G: Strain Sp12.

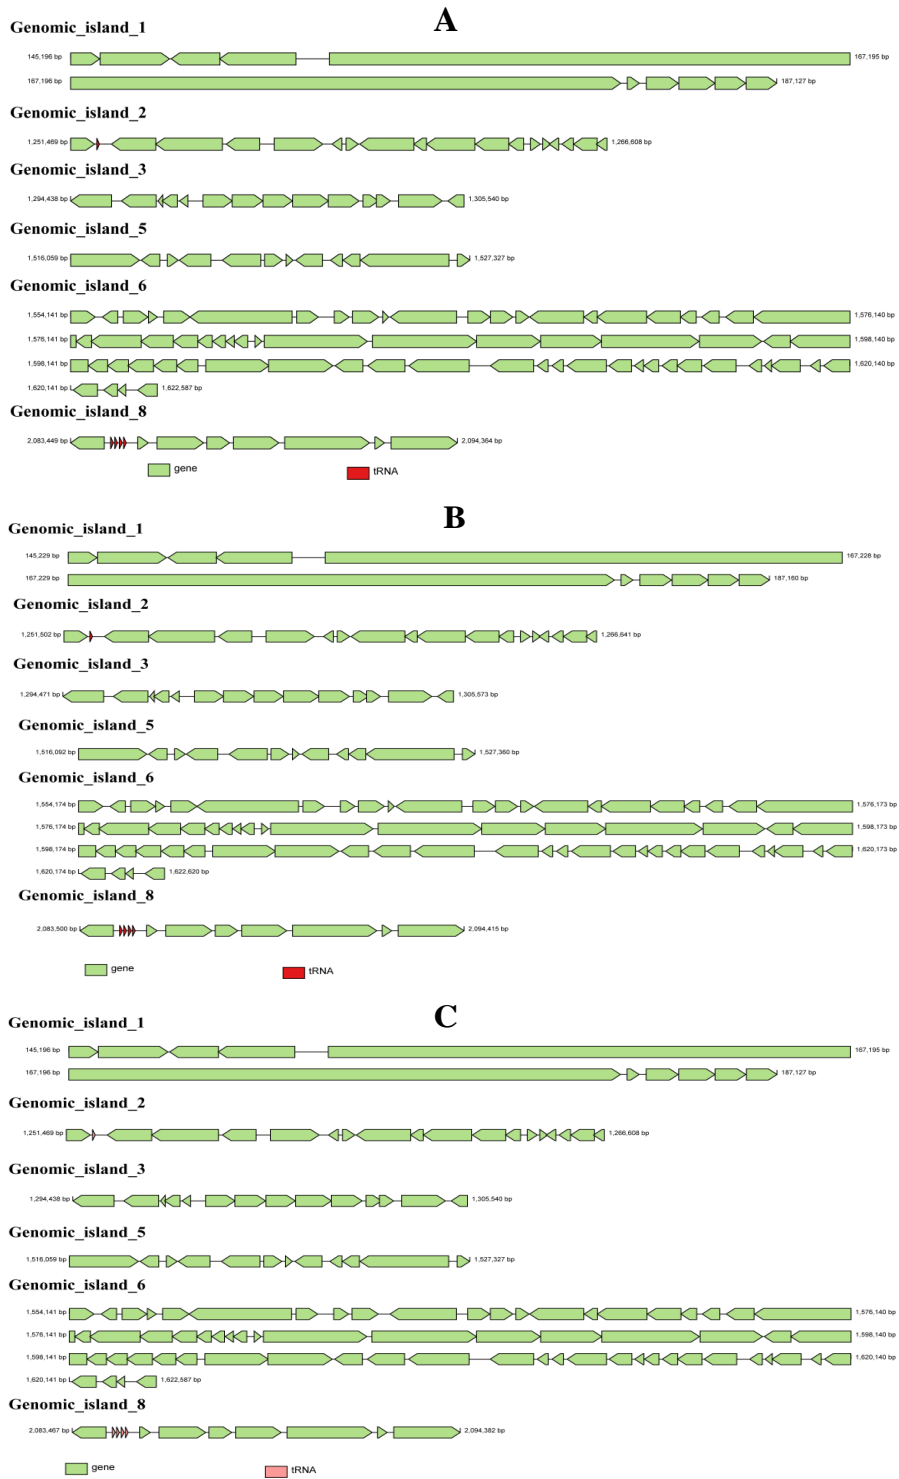

**Figure S9.** Gene island information shared by three inhibitory strains. (A) represented the gene fragment composition information of the base island in strain Sp10. (B) represented the gene fragment composition information of gene island in strain Sp11. (C) represented the composition information of gene island fragment in strain Sp12.

**Table S1.** Effects of inoculation of *Pseudomonas* on seed germination and comprehensive evaluation of the growth promotion.

| Strains | Mean (U)    | comprehensive assessment | Strains | Mean (U)    | comprehensive assessment |
|---------|-------------|--------------------------|---------|-------------|--------------------------|
| St1     | 0.67±0.03ab | P                        | St18    | 0.47±0.03c  | N                        |
| St2     | 0.65±0.02ab | P                        | St19    | 0.45±0.02cd | N                        |
| St3     | 0.68±0.02ab | P                        | St20    | 0.39±0.02d  | N                        |
| St4     | 0.68±0.02ab | P                        | St21    | 0.66±0.02ab | P                        |
| St5     | 0.69±0.03ab | P                        | St22    | 0.7±0.02ab  | P                        |
| St6     | 0.69±0.03ab | P                        | St23    | 0.68±0.01ab | P                        |
| St7     | 0.7±0.04ab  | P                        | St24    | 0.7±0.03a   | P                        |
| St8     | 0.67±0.02ab | P                        | St25    | 0.69±0.02ab | P                        |
| St9     | 0.67±0.02ab | P                        | St26    | 0.7±0.02ab  | P                        |
| St10    | 0.66±0.02ab | P                        | St27    | 0.7±0.04a   | P                        |
| St11    | 0.66±0.02ab | P                        | St28    | 0.69±0.02ab | P                        |
| St12    | 0.66±0.02ab | P                        | St29    | 0.7±0.03a   | P                        |
| St13    | 0.67±0.02ab | P                        | St30    | 0.4±0.01d   | N                        |
| St14    | 0.67±0.02ab | P                        | St31    | 0.2±0.02e   | I                        |
| St15    | 0.62±0.02b  | P                        | St32    | 0.22±0.02e  | I                        |
| St16    | 0.67±0.03ab | P                        | St33    | 0.21±0.02e  | I                        |
| St17    | 0.4±0.01d   | N                        | St34    | 0.21±0.01e  | I                        |

Note: St1-St34 represented strains of *Pseudomonas*, P was promotion, N was no effect, I was Inhibition.

Values were mean ± standard error (SE), n=4 with bars indicating SE. These different small letters represented that there was a significant difference among the 34 inoculated strains at P<0.05.



**Table S2. Information of *Pseudomonas* strains, based on the genome sequencing**

| Strain | Genome size (bp) | GC content | rRNA genes | tRNA genes | Coding density (%) | Protein coding sequences (CDS) |
|--------|------------------|------------|------------|------------|--------------------|--------------------------------|
| Sp1    | 6529891          | 61.81%     | 22         | 80         | 88.52%             | 983                            |
| Sp3    | 5483521          | 61.28%     | 22         | 77         | 89.59%             | 986                            |
| Sp5    | 4810218          | 62.43%     | 12         | 62         | 93.34%             | 962                            |
| Sp7    | 5134834          | 62.37%     | 12         | 67         | 89.88%             | 978                            |
| Sp10   | 5388833          | 60.96%     | 22         | 81         | 88.64%             | 979                            |
| Sp11   | 6384282          | 61.88%     | 22         | 78         | 88.63%             | 989                            |
| Sp12   | 6089740          | 60.94%     | 44         | 179        | 88.60%             | 987                            |

**Table S3.** Information of horizontal gene transfer

| Sample | Share number | Total number |
|--------|--------------|--------------|
| Sp1    | 0            | 686          |
| Sp3    | 0            | 725          |
| Sp5    | 0            | 768          |
| Sp7    | 0            | 386          |
| Sp10   | 0            | 532          |
| Sp11   | 0            | 1069         |
| Sp12   | 0            | 555          |

**Table S4.** Information of SNP (single nucleotide variation), Small InDel and structural variation

| Sample | SNP Number | Small InDel Number | structural variation |                 |
|--------|------------|--------------------|----------------------|-----------------|
|        |            |                    | Insertion Number     | Deletion Number |
| Sp3    | 359094     | 15591              | 14                   | 59              |
| Sp5    | 86323      | 4143               | 1                    | 2               |
| Sp7    | 126108     | 6228               | 1                    | 6               |
| Sp10   | 338213     | 11336              | 2                    | 64              |
| Sp11   | 256        | 5                  | 6                    | 144             |
| Sp12   | 292103     | 9697               | 3                    | 72              |

Note: SNP: nucleic acid variation at a single site; Small InDel: Insertion or deletion of a sequence of small fragments at a location in the genome, less than 50 bp in length; SV: Large gene segment insertion, deletion, repetition, inversion and the length is less than 50 bp.



**Table S5.** The id of gene islands predicted by 7 strains and the information of gene fragments contained in the gene islands were involved in this paper. (Note: Because the attached table is too large, the title part of the chart, such as strain number, gene island number and gene number, has been marked with orange. The 6 key gene islands with high similarity mentioned in the paper, Sp10, Sp11 and Sp12, have been marked with blue background.)

**Table S6.** Gene function annotation information of gene fragments contained in 6 gene islands with high similarity in Sp10, Sp11 and Sp12. (Note: Only genes annotated to KEGG function are listed; those that have not been annotated are not shown. As the table is too large, the title parts of the chart such as strain number, gene island number and gene number have been marked in orange. “✓” represented a gene is present in strain.
